# Supplementary material for: Porcine Reproductive and Respiratory Syndrome Virus Engineered by Serine Substitution on the 44th Amino Acid of GP5 Resulted in a Potential Vaccine Candidate with the Ability to Produce High Levels of Neutralizing Antibody
Source: MDPI journal article supplement (doi:10.3390/vetsci10030191), 2023-03-03
Supplement: s1 [file s1]

**Table S2.** Clinical score after infection with the tentative hypoglycosylated mutant virus. Every 0, 1, 3, 7, 14, 21, 28, 35, and 42 d post-inoculation, the degree of clinical signs was measured according to the criteria of the previous study.

[illegible]
