# Supplementary material for: Porcine Reproductive and Respiratory Syndrome Virus Engineered by Serine Substitution on the 44th Amino Acid of GP5 Resulted in a Potential Vaccine Candidate with the Ability to Produce High Levels of Neutralizing Antibody
Source: MDPI journal article supplement (doi:10.3390/vetsci10030191), 2023-03-03
Supplement: s1 [file s1]

**Table S1.** Level of viremia after inoculation with vCSL1-GP5-N44S. RNA was extracted from the serum obtained 0, 1, 3, 7, 14, 21, 28, 35, and 42 d post-inoculation; the virus titer in the serum was measured using the RT-qPCR technique.

[illegible]
